# Supplementary material for: Influenza A Virus-Induced circRNA circMerTK Negatively Regulates Innate Antiviral Responses
Source: PubMed Central journal article supplement (PMC10100971; doi:10.1128/spectrum.03637-22), 2023-02-27
Supplement: spectrum.03637-22-s0001.pdf [file spectrum.03637-22-s0001.pdf]

# Supplementary figure 1

**A**

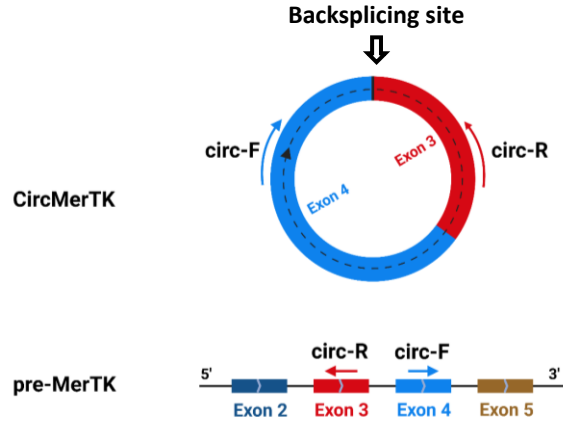

**B**

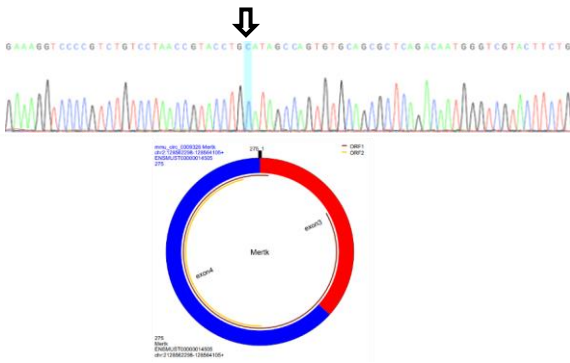

**C**

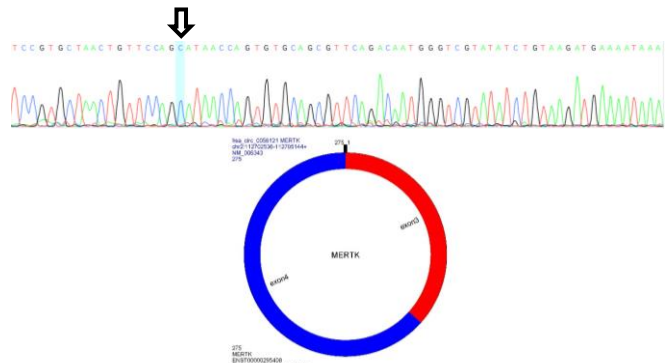

**D**

|               | Score         | Expect               | Identities                                 | Gaps      | Strand    |
|---------------|---------------|----------------------|--------------------------------------------|-----------|-----------|
|               | 322 bits(356) | 7e-93                | 236/275(86%)                               | 0/275(0%) | Plus/Plus |
| hsa-circMerTK | 1             | CATAACCAGTGTGCAGCGTT | CAGACAATGGGTCGTATATCTGTAAGATGAAAATAAACAA   | 60        |           |
| mmu-circMerTK | 1             | CATAGCCAGTGTGCAGCGCT | CAGACAATGGGTCGTACTTCTGTAAGATGAAGGTGAACAA   | 60        |           |
| hsa-circMerTK | 61            | TGAAGAGATCGTGTCTGAT  | CCCATCTACATCGAAGTACAAGGACTTCCCTCACTTTACTAA | 120       |           |
| mmu-circMerTK | 61            | TAGAGAGATTGTATCTGAT  | CCCATATACGTGGAAGTTC AAGGACTCCCTTACTTTATTAA | 120       |           |
| hsa-circMerTK | 121           | GCAGCCTGAGAGCATGAAT  | GTCACCAGAAACACAGCCTTCAACCTCACCTGTCAGGCTGT  | 180       |           |
| mmu-circMerTK | 121           | GCAGCCTGAGAGTGTGAAT  | GTCACCAGAAACACAGCCTTCAACCTCACCTGCCAGGCCGT  | 180       |           |
| hsa-circMerTK | 181           | GGGCCCGCCTGAGCCCGT   | CAACATTTTCTGGGTTCAAACAGTAGCCGTGTTAACGAACA  | 240       |           |
| mmu-circMerTK | 181           | GGGCCCTCCTGAGCCCGT   | CAATATCTTCTGGGTTCAAATAGCAGCCGTGTTAATGAAA   | 240       |           |
| hsa-circMerTK | 241           | GCCTGAAAAATCCCCCT    | CCGTGCTAACTGTTCCAG                         | 275       |           |
| mmu-circMerTK | 241           | ACCGAAAGGTC          | CCCGTGTCTTAACCGTACCTG                      | 275       |           |

**FIG S1** (A) Schematic illustration of the circMerTK structure and the design strategy for the divergent primers (circ-F, circ-R) to target only the circular RNA and not the linear mRNA or pre-MerTK. (B) The schematic drawing represents the mouse homolog, and (C) the human homolog of circMerTK formed by backsplicing between exon 3 and exon 4 of MERTK pre-mRNA. The top part is the Sanger sequencing data; the arrow points at the backsplicing junction site. Schematic representation was generated by circPrimer2.0. (D) A multiple sequence alignment of human circMerTK (hsa-circMerTK) and the mouse circMerTK homolog (mmu-circMerTK), was made using basic local alignment search tool (BLAST, <https://blast.ncbi.nlm.nih.gov/Blast.cgi>).

## Supplementary figure 2

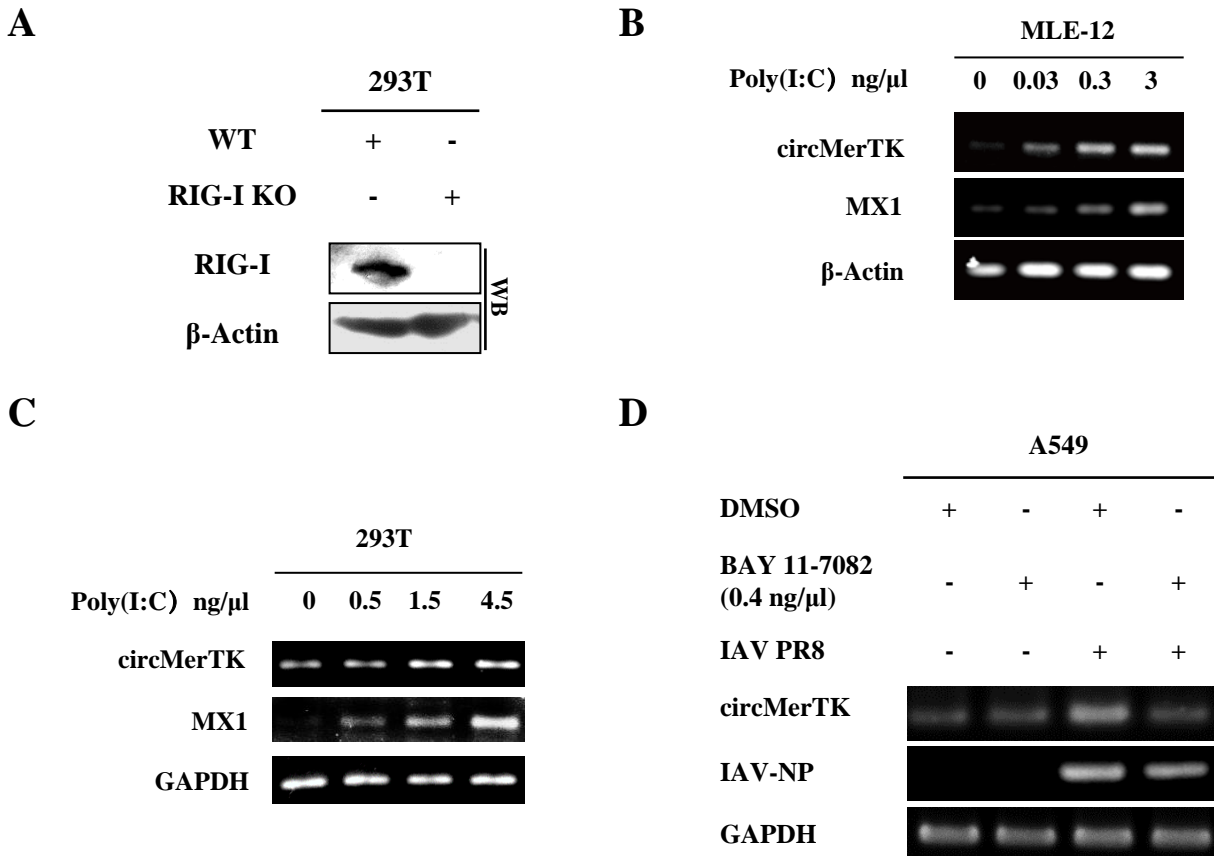

**FIG S2** (A) Wild type (WT) 293T and RIG-I knockout (KO) 293T cell lines were examined for RIG-I protein expression by western blot. (B) MLE-12, and (C) 293T cell lines were transfected with poly(I:C) at indicated concentrations for 4 h. Then, the levels of circMerTK and MX1 were analyzed by RT-PCR. (D) A549 cells were either treated with BAY 11-7082 or DMSO and then infected with IAV PR8 or mock-infected for 14 hours. RT-PCR assessed the expression of circMerTK. Shown are representative data from three independent experiments. IAV-NP: IAV nucleoprotein; WB: western blot.

# Supplementary figure 3

**A**

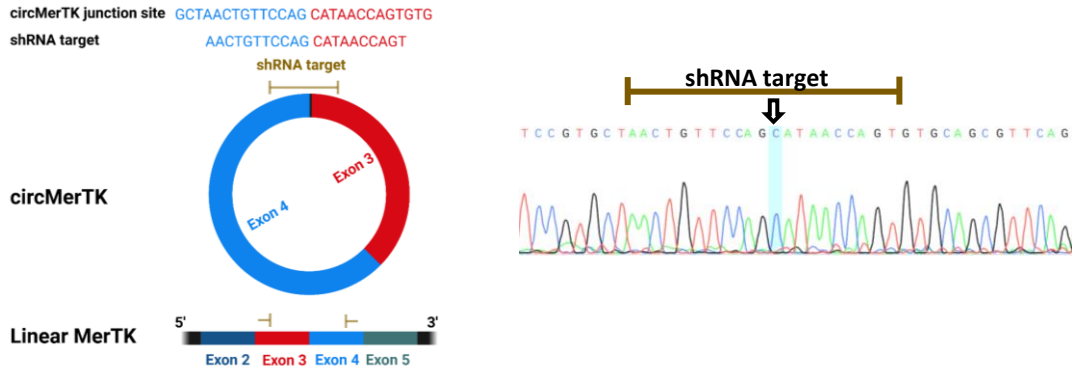

**B**

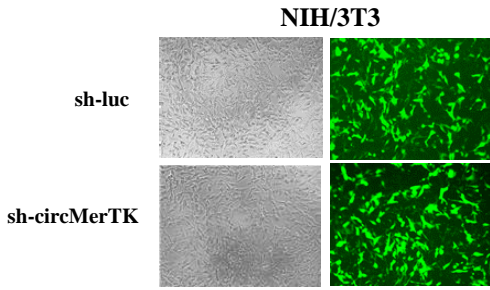

**C**

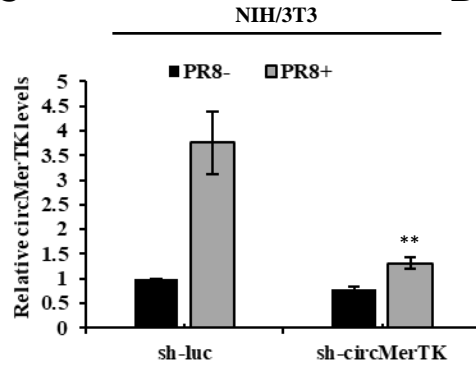

**D**

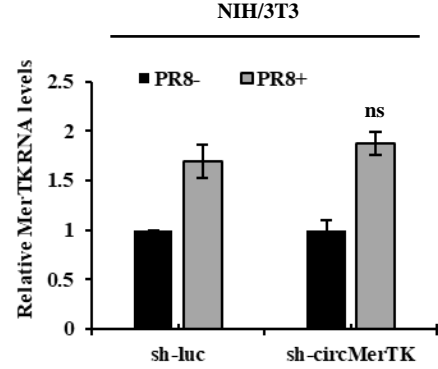

**E**

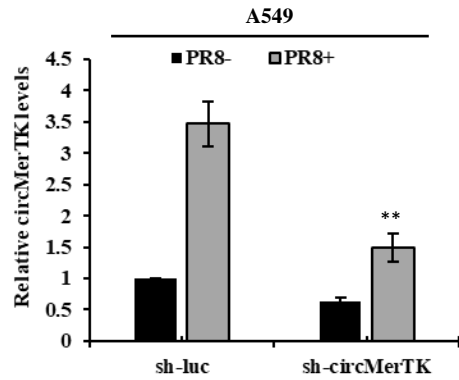

**F**

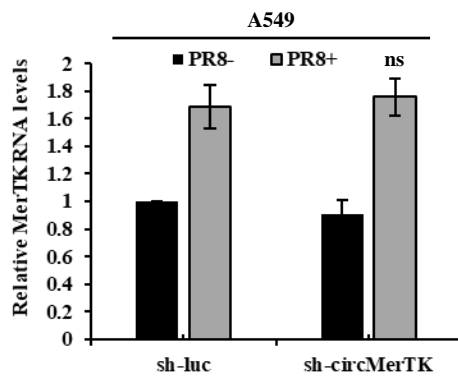

**G**

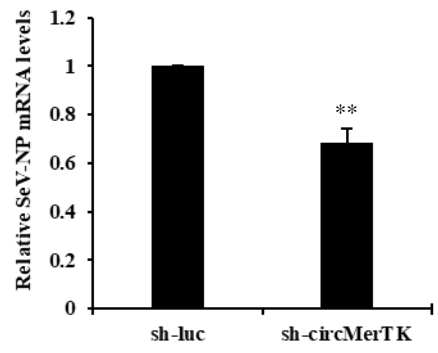

**H**

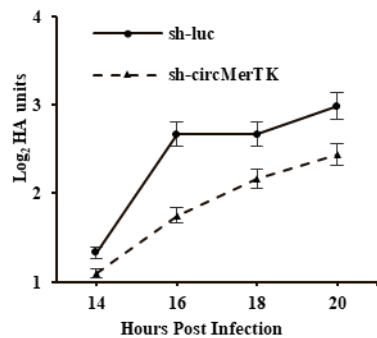

**I**

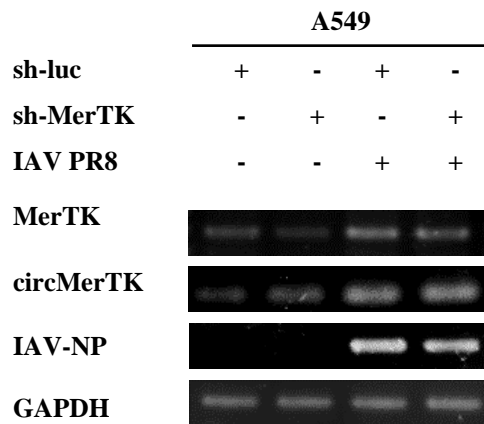

**J**

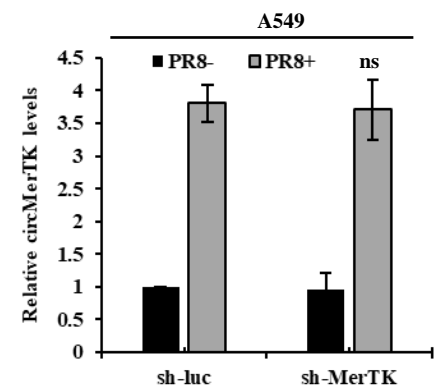

**FIG S3** (A) Schematic illustration of the shRNA designed to target the human circMerTK without altering the expression of linear MerTK. (B) The transduction efficiency of NIH/3T3 cells stably expressing pSIH-H1-GFP vectors targeting circMerTK or luciferase control, was measured by visualizing the green fluorescent protein (GFP) fluorescence activity. (C-D) The expression levels of circMerTK and MerTK mRNA were assessed in sh-luc and sh-circMerTK NIH/3T3 cell lines by RT-qPCR. (E-F) The expression levels of circMerTK and MerTK mRNA were relatively quantified in sh-luc and sh-circMerTK A549 cell lines by RT-qPCR. (G) RT-qPCR was used to determine the mRNA levels of Sev-NP after SeV infection in sh-luc, and sh-circMerTK A549 cell lines for 16 hours (MOI = 0.5). (H) SeV titers in supernatants of SeV-infected sh-luc and sh-circMerTK A549 knockdown cells were measured at indicated time points by HA assay (MOI = 0.5). (I-J) The expression levels of circMerTK and MerTK mRNA were assessed in sh-luc and sh-MerTK A549 cell lines by RT-PCR and RT-qPCR. Results are shown as representative of three independent experiments with similar results. Data represent the mean values  $\pm$  SD (n=3; ns= not significant, \*\*p < 0.01). IAV-NS1: IAV non-structural protein 1; IAV-NP: IAV nucleoprotein; SeV-NP: SeV nucleocapsid protein; WB: western blot.

# Supplementary figure 4

**A**

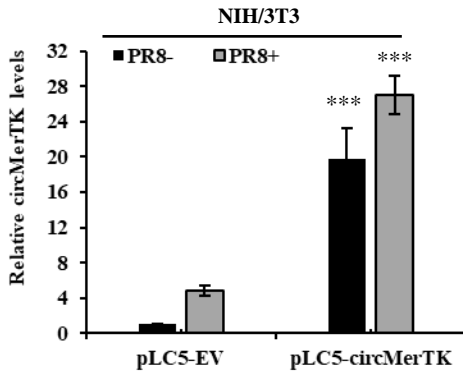

**B**

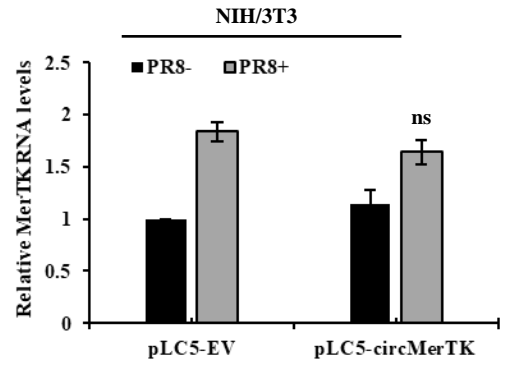

**C**

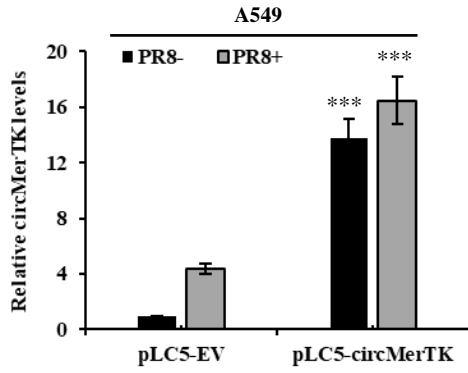

**D**

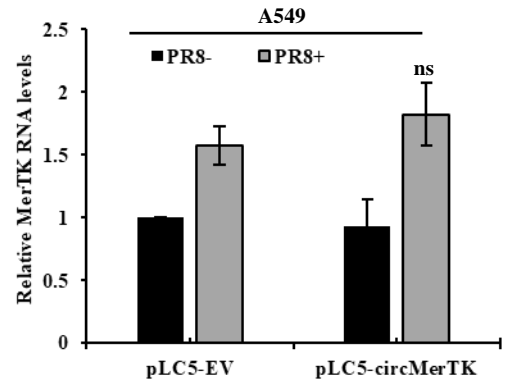

**E**

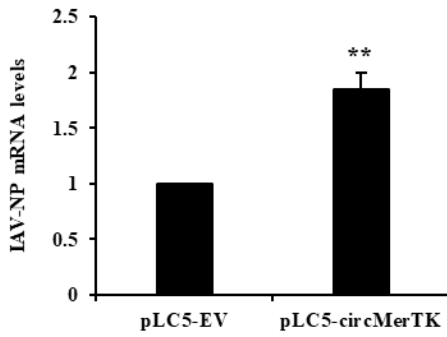

**F**

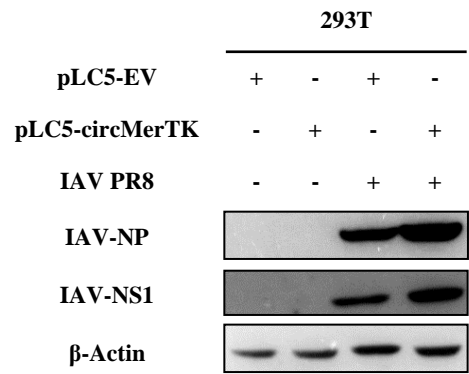

**G**

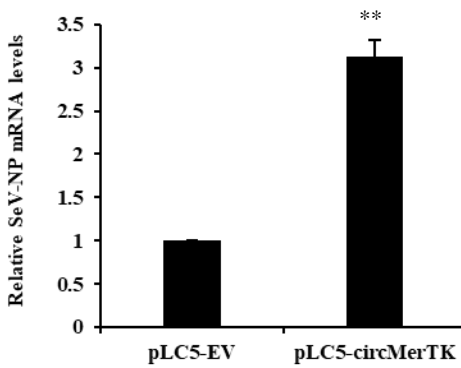

**H**

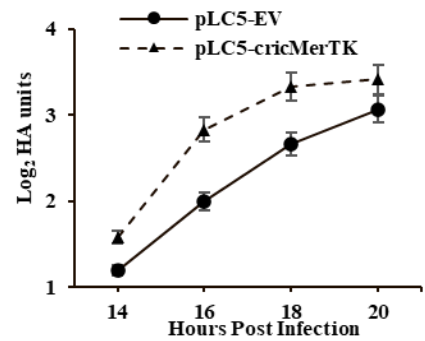

**FIG S4** (A-B) The circMerTK and MerTK mRNA expression levels were assessed in pLC5-EV and pLC5-circMerTK NIH/3T3 cell lines by RT-qPCR. (C-D) The circMerTK and MerTK mRNA expression levels were evaluated in pLC5-EV and pLC5-circMerTK A549 cell lines by RT-qPCR. (E) RT-qPCR was used to determine the mRNA levels of IAV-NP after IAV PR8 infection in pLC5-EV, and pLC5-circMerTK stably expressed A549 cell lines for 16 hours (MOI = 0.5). (F) Western blotting was utilized to determine the protein levels of IAV-NP and IAV-NS1 after IAV PR8 infection of 293T stably expressing pLC5-EV or pLC5-circMerTK. (G) RT-qPCR was used to determine the mRNA levels of Sev-NP after SeV infection in pLC5-EV, and pLC5-circMerTK A549 cell lines for 16 hours (MOI = 0.5). (H) SeV titers in supernatants of SeV-infected pLC5-EV and pLC5-circMerTK A549 overexpression cells were measured at indicated time points by HA assay (MOI = 0.5). Results are shown as representative of three independent experiments with similar results. Data represent the mean values  $\pm$  SD (n=3; ns= not significant, \*\*p < 0.01, \*\*\*p < 0.001). IAV-NS1: IAV non-structural protein 1; IAV-NP: IAV nucleoprotein; Sev-NP: SeV nucleocapsid protein; WB: western blot.

## Supplementary figure 5

**A**

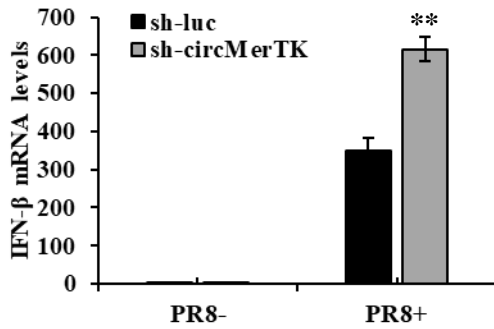

**B**

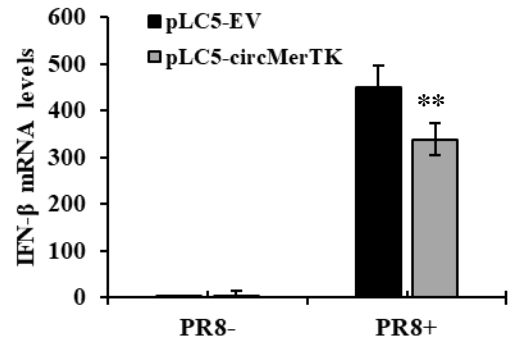

**FIG S5** (A) A549 cell lines stably expressing specific shRNAs targeting circMerTK or luciferase were infected with or without IAV PR8 for 14 h. IFN- $\beta$  mRNA expression levels were relatively quantified by RT-qPCR. (B) A549 cell lines stably expressing pLC5-EV or pLC5-circMerTK were challenged with or without IAV PR8 for 14 h. IFN- $\beta$  mRNA expression levels were relatively quantified by RT-qPCR. Data represent mean  $\pm$  SD (n=3; \*\*p < 0.01).



## Supplementary figure 6

A

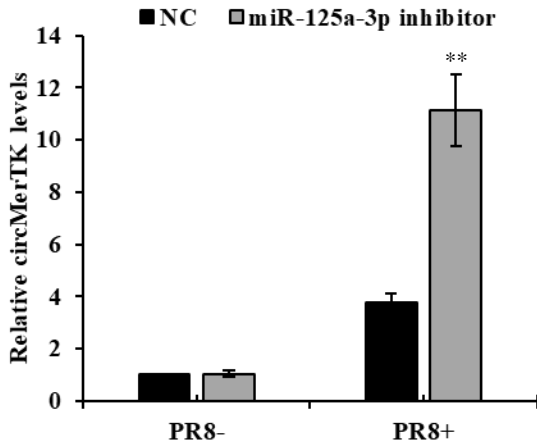

B

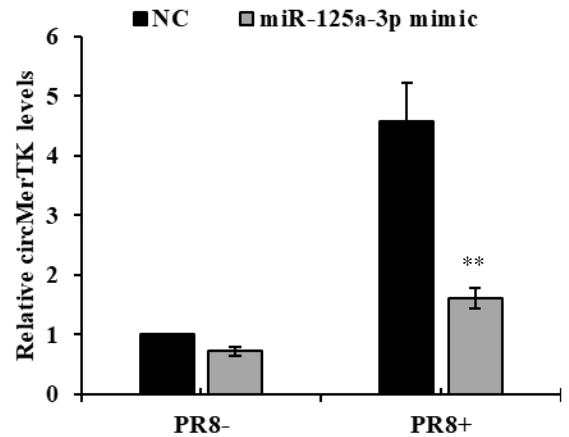

**FIG S6** (A) A549 cell lines were transfected with either negative control (NC) or miR-125a-3p inhibitor for 24 h, followed by challenging both cell lines with IAV PR8 infection for 14h. The expression levels of circMerTK were determined by RT-qPCR in challenged and unchallenged cell lines. (B) A549 cell lines were transfected with either negative control (NC) or miR-125a-3p mimic for 24 h, followed by challenging both cell lines with IAV PR8 infection for 14h. The expression levels of circMerTK were determined by RT-qPCR in challenged and unchallenged cell lines. Data represent mean  $\pm$  SD (n=3; \*\*p < 0.01).

1 **Supplementary table 1**

| mRNA Primers        |                                |
|---------------------|--------------------------------|
| M- $\beta$ -Actin-F | 5'-AATGGGTCAGAAGGACTCCT-3'     |
| M- $\beta$ -Actin-R | 5'-ACGGTTGGCCTTAGGGTTCAG-3'    |
| M-GAPDH-F           | 5'-GCCTCGTCCCGTAGACAAAA-3'     |
| M-GAPDH-R           | 5'-CCCTTTTGGCTCCACCCTTC-3'     |
| H-GAPDH-F           | 5'-TGGGTGTGAACCATGAGAAGT-3'    |
| H-GAPDH-R           | 5'-AAGGCCATGCCAGTGAGCTT-3'     |
| C- $\beta$ -Actin-F | 5'-GCCAACAGAGAGAAGATGACAC-3'   |
| C- $\beta$ -Actin-R | 5'-GTAACACCATCACCAGAGTCCA-3'   |
| P- $\beta$ -Actin-F | 5'-GACCTGACCGACTACCTCAT-3'     |
| P- $\beta$ -Actin-R | 5'-CGTAGAGGTCCTTCCTGATGT-3'    |
| M-circSOCS7-F       | 5'-TGGTACTGGGGACCTATGAAT-3'    |
| M-circSOCS7-R       | 5'-GGATTCTGACGCTCTGATGG-3'     |
| M-circIRF2-F        | 5'-ATGTGCCATGAATTCCCTGC-3'     |
| M-circIRF2-R        | 5'-TCCTTTTCCACGTCCCATCC-3'     |
| M-circTrappc9-F     | 5'-AGCTCATCCTGGAACACCTG-3'     |
| M-circTrappc9-R     | 5'-TCTCTCTTCTTCCAGCTGCT-3'     |
| IAV-NP-F            | 5'-TCAAACGTGGGATCAATG-3'       |
| IAV-NP-R            | 5'-GTGCAGACCGTGCTAGAA-3'       |
| IAV-NS1-F           | 5'-ATGTTATTTGCTCAAACTATTC-3'   |
| IAV-NS1-R           | 5'-CTACCTAACTGACATGACTCTT-3'   |
| PRV-gE-F            | 5'-GCCGAGTACGTCACGGTCATCAAG-3' |
| PRV-gE-R            | 5'-GAGCACAGCACGCAGAGCCAGA-3'   |
| H9N2-NP-F           | 5'-CCTGCTTGTGTGTACGGACT-3'     |
| H9N2-NP-R           | 5'-TGAAGCAGACGGAAAGGGTC-3'     |
| SeV-NP-F            | 5'-ATAAGTCGGGAGGAGGTGCT-3'     |
| SeV-NP-R            | 5'-GTTGACCCTGGAAGAGTGGG-3'     |

|                   |                                |
|-------------------|--------------------------------|
| MDRV-P10.8-F      | 5'-ATGGCTGACGCTTTTGAAGT-3'     |
| MDRV-P10.8-R      | 5'-TAGTTAGATCTCGAGAGCCCG-3'    |
| M-MerTK-F         | 5'-ACGTTGGTGGATACGTGCAT-3'     |
| M-MerTK-R         | 5'-CTCTTCCCCTTCTCGGCAG-3'      |
| H-MerTK-F         | 5'-TCGCTTCCTTCAGCATAACCA-3'    |
| H-MerTK-R         | 5'-CAGGCCTGGAACAGTTAGCA-3'     |
| M-circMerTK-F     | 5'-TGTCACCAGAAACACAGCCT-3'     |
| M-circMerTK-R     | 5'-GGAGTCCTTGAACCTCCACG-3'     |
| M-circMerTK-qF    | 5'-CCTCCTGAGCCCGTCAATATC-3'    |
| M-circMerTK-qR    | 5'-TGAACCTCCACGTATATGGGATCA-3' |
| H-circMerTK-F     | 5'-AGCCCGTCAACATTTTCTGG-3'     |
| H-circMerTK-R     | 5'-TCATGCTCTCAGGCTGCTTA-3'     |
| H-circMerTK-qF    | 5'-GTGCTAACTGTTCCAGCATAACC-3'  |
| H-circMerTK-qR    | 5'-CATGCTCTCAGGCTGCTTAGT-3'    |
| C- circMerTK-F    | 5'-TTCTGACTGTCCCAGCATCC-3'     |
| C- circMerTK-R    | 5'-GGCTGTTGAATGAAGTGTGGG-3'    |
| P-circMerTK-F     | 5'-TACGAGGCAGCCTGAGAGTAT-3'    |
| P-circMerTK-R     | 5'-GCACACTGGTTATGCAGGAA-3'     |
| M-Mx1-F           | 5'-AGTAAGTGCAGCTGGTTCCT-3'     |
| M-Mx1-R           | 5'-AAGGATCATTGCACAGCGAC-3'     |
| H-Mx1-F           | 5'-GACATTCGGCTGTTTACC-3'       |
| H-Mx1-R           | 5'-GCGGTTCTGTGGAGGTTA-3'       |
| M-IFN- $\beta$ -F | 5'-GGTCCGAGCAGAGATCTTCA-3'     |
| M-IFN- $\beta$ -R | 5'-CACTACCAGTCCCAGAGTCC-3'     |
| H-IFN- $\beta$ -F | 5'-ACCAACAAGTGTCTCCTCCAA-3'    |
| H-IFN- $\beta$ -R | 5'-TCTCCTCAGGGATGTCAAAGT-3'    |
| H-IFITM3-F        | 5'-TGGCCAGCCCCCAACTAT-3'       |
| H-IFITM3-R        | 5'-CATAGGCCTGGAAGATCAG-3'      |

H-ISG15-F                      5'- AGCATCTTCACCGTCAGGTC-3'  
H-ISG15-R                      5'- GCGAACTCATCTTTGCCAGT-3'

---

| shRNA sequence     |                               |
|--------------------|-------------------------------|
| Human sh-circMerTK | 5'- AACTGTTCCAGCATAACCAGT-3'  |
| Human sh-MerTK     | 5'- GATAATATATATTTATTTAAA-3'  |
| Mouse sh-circMerTK | 5'- CGTACCTGCATAGCCAGTG-3'    |
| Human sh-IRF3      | 5'- CATTGTAGATCTGATTACCTTC-3' |
| Human sh-IRF7      | 5'- GCCTCTATGACGACATCGAGT-3'  |
| Human sh-MDA5      | 5'- CCAACAAAGAAGCAGTGTATA-3'  |
| Human sh-MAVS      | 5'- GGCAGGTCAGTTAACAATTTA-3'  |

---

| sgRNA sequence         |                            |
|------------------------|----------------------------|
| Human sgRNA: IFNAR1 #1 | 5'-CTGCGGCGGCTCCAGATGA-3'  |
| Human sgRNA: IFNAR1 #2 | 5'-CCAGATGATGGTCGTCCTCC-3' |
| Human sgRNA: RIG-I #1  | 5'-ACGCAGCCTGCAAGCCTTCC-3' |
| Human sgRNA: RIG-I #2  | 5'-AAGCCTTCCAGGATTATATC-3' |

---

2

3

4 **Supplementary figure legends**

5 **FIG S1** (A) Schematic illustration of the circMerTK structure and the design strategy  
6 for the divergent primers (circ-F, circ-R) to target only the circular RNA and not the  
7 linear mRNA or pre-MerTK. (B) The schematic drawing represents the mouse  
8 homolog, and (C) the human homolog of circMerTK formed by backsplicing between  
9 exon 3 and exon 4 of MERTK pre-mRNA. The top part is the Sanger sequencing data;  
10 the arrow points at the backsplicing junction site. Schematic representation was  
11 generated by circPrimer2.0. (D) A multiple sequence alignment of human circMerTK  
12 (hsa-circMerTK) and the mouse circMerTK homolog (mmu-circMerTK), was made  
13 using basic local alignment search tool (BLAST,  
14 <https://blast.ncbi.nlm.nih.gov/Blast.cgi>).

15  
16 **FIG S2** (A) Wild type (WT) 293T and RIG-I knockout (KO) 293T cell lines were  
17 examined for RIG-I protein expression by western blot. (B) MLE-12, and (C) 293T  
18 cell lines were transfected with poly(I:C) at indicated concentrations for 4 h. Then, the  
19 levels of circMerTK and MX1 were analyzed by RT-PCR. (D) A549 cells were either  
20 treated with BAY 11-7082 or DMSO and then infected with IAV PR8 or mock-  
21 infected for 14 hours. RT-PCR assessed the expression of circMerTK. Shown are  
22 representative data from three independent experiments. IAV-NP: IAV nucleoprotein;  
23 WB: western blot.

24  
25 **FIG S3** (A) Schematic illustration of the shRNA designed to target the human  
26 circMerTK without altering the expression of linear MerTK. (B) The transduction  
27 efficiency of NIH/3T3 cells stably expressing pSIH-H1-GFP vectors targeting  
28 circMerTK or luciferase control, was measured by visualizing the green fluorescent  
29 protein (GFP) fluorescence activity. (C-D) The expression levels of circMerTK and  
30 MerTK mRNA were assessed in sh-luc and sh-circMerTK NIH/3T3 cell lines by RT-  
31 qPCR. (E-F) The expression levels of circMerTK and MerTK mRNA were relatively  
32 quantified in sh-luc and sh-circMerTK A549 cell lines by RT-qPCR. (G) RT-qPCR  
33 was used to determine the mRNA levels of Sev-NP after SeV infection in sh-luc, and  
34 sh-circMerTK A549 cell lines for 16 hours (MOI = 0.5). (H) SeV titers in  
35 supernatants of SeV-infected sh-luc and sh-circMerTK A549 knockdown cells were  
36 measured at indicated time points by HA assay (MOI = 0.5). (I-J) The expression

37 levels of circMerTK and MerTK mRNA were assessed in sh-luc and sh-MerTK A549  
38 cell lines by RT-PCR and RT-qPCR. Results are shown as representative of three  
39 independent experiments with similar results. Data represent the mean values  $\pm$  SD  
40 (n=3; ns= not significant,  $**p < 0.01$ ). IAV-NS1: IAV non-structural protein 1; IAV-  
41 NP: IAV nucleoprotein; SeV-NP: SeV nucleocapsid protein; WB: western blot.

42

43 **FIG S4** (A-B) The circMerTK and MerTK mRNA expression levels were assessed in  
44 pLC5-EV and pLC5-circMerTK NIH/3T3 cell lines by RT-qPCR. (C-D) The  
45 circMerTK and MerTK mRNA expression levels were evaluated in pLC5-EV and  
46 pLC5-circMerTK A549 cell lines by RT-qPCR. (E) RT-qPCR was used to determine  
47 the mRNA levels of IAV-NP after IAV PR8 infection in pLC5-EV, and pLC5-  
48 circMerTK stably expressed A549 cell lines for 16 hours (MOI = 0.5). (F) Western  
49 blotting was utilized to determine the protein levels of IAV-NP and IAV-NS1 after  
50 IAV PR8 infection of 293T stably expressing pLC5-EV or pLC5-circMerTK. (G) RT-  
51 qPCR was used to determine the mRNA levels of Sev-NP after SeV infection in  
52 pLC5-EV, and pLC5-circMerTK A549 cell lines for 16 hours (MOI = 0.5). (H) SeV  
53 titers in supernatants of SeV-infected pLC5-EV and pLC5-circMerTK A549  
54 overexpression cells were measured at indicated time points by HA assay (MOI =  
55 0.5). Results are shown as representative of three independent experiments with  
56 similar results. Data represent the mean values  $\pm$  SD (n=3; ns= not significant,  $**p <$   
57  $0.01$ ,  $***p < 0.001$ ). IAV-NS1: IAV non-structural protein 1; IAV-NP: IAV  
58 nucleoprotein; SeV-NP: SeV nucleocapsid protein; WB: western blot.

59

60 **FIG S5** (A) A549 cell lines stably expressing specific shRNAs targeting circMerTK  
61 or luciferase were infected with or without IAV PR8 for 14 h. IFN- $\beta$  mRNA  
62 expression levels were relatively quantified by RT-qPCR. (B) A549 cell lines stably  
63 expressing pLC5-EV or pLC5-circMerTK were challenged with or without IAV PR8  
64 for 14 h. IFN- $\beta$  mRNA expression levels were relatively quantified by RT-qPCR. Data  
65 represent mean  $\pm$  SD (n=3;  $**p < 0.01$ ).

66

67 **FIG S6** (A) A549 cell lines were transfected with either negative control (NC) or  
68 miR-125a-3p inhibitor for 24 h, followed by challenging both cell lines with IAV PR8  
69 infection for 14h. The expression levels of circMerTK were determined by RT-qPCR  
70 in challenged and unchallenged cell lines. (B) A549 cell lines were transfected with

71 either negative control (NC) or miR-125a-3p mimic for 24 h, followed by challenging  
72 both cell lines with IAV PR8 infection for 14h. The expression levels of circMerTK  
73 were determined by RT-qPCR in challenged and unchallenged cell lines. Data  
74 represent mean  $\pm$  SD (n=3; \*\*p < 0.01).
